# Supplementary material for: Mitotic arrest affects clustering of tumor cells
Source: PubMed Central journal article supplement (PMC7847029; doi:10.1186/s13008-021-00070-z), 2021-01-29
Supplement: 13008_2021_70_MOESM1_ESM.pdf [file 13008_2021_70_MOESM1_ESM.pdf]

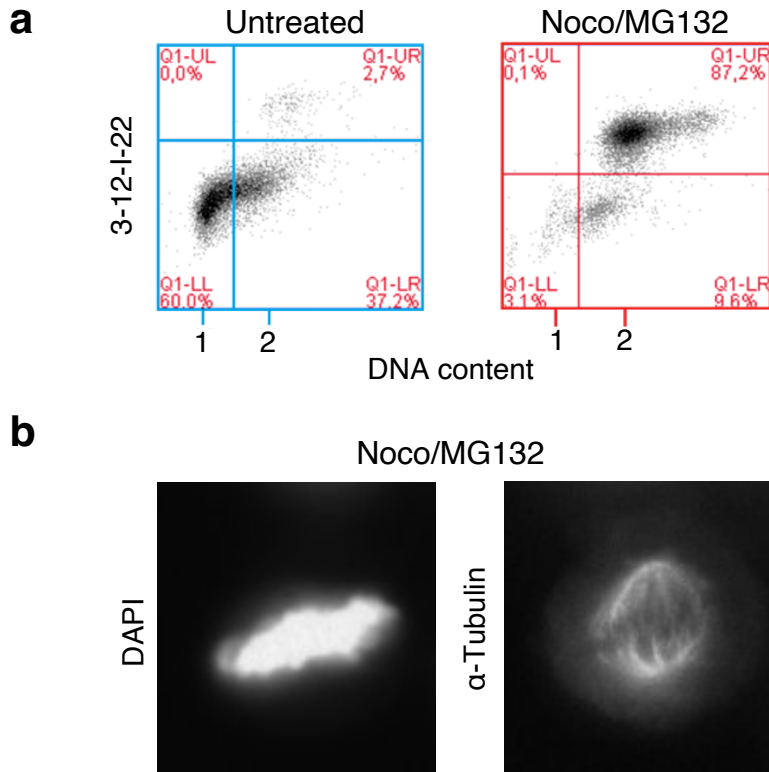

### Supplementary Figure S1. Synchronization procedure

**a** Flow cytometry analysis of control (untreated) and mitosis-arrested cells (nocodazole/MG132). Mitotic cells were detected with the mitotic-specific monoclonal 3-12-I-22 antibody.

**b** Representative fluorescence microscopy images (DAPI and  $\alpha$ -tubulin) of cells blocked in mitosis (nocodazole/MG132) and used for the clustering assays. Scale bar: 10 $\mu$ m.
