# Supplementary material for: Mitotic arrest affects clustering of tumor cells
Source: PubMed Central journal article supplement (PMC7847029; doi:10.1186/s13008-021-00070-z), 2021-01-29
Supplement: 13008_2021_70_MOESM5_ESM.pdf [file 13008_2021_70_MOESM5_ESM.pdf]

**A**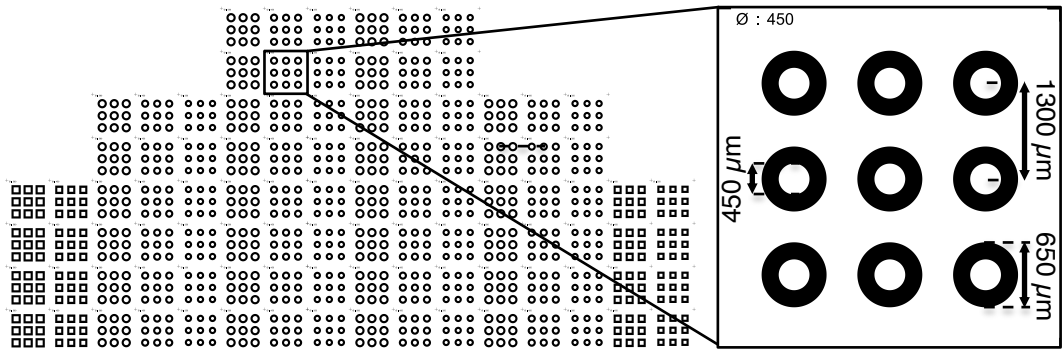**B**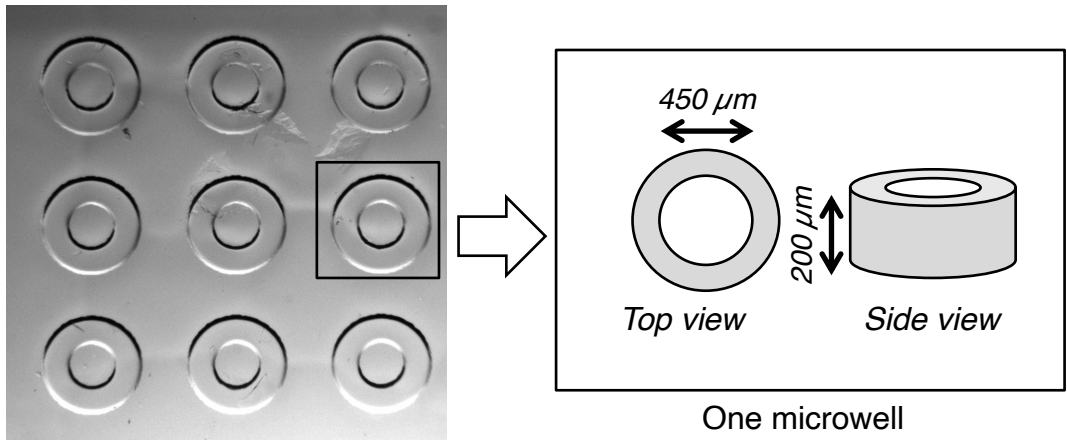

9 microdevices

**C**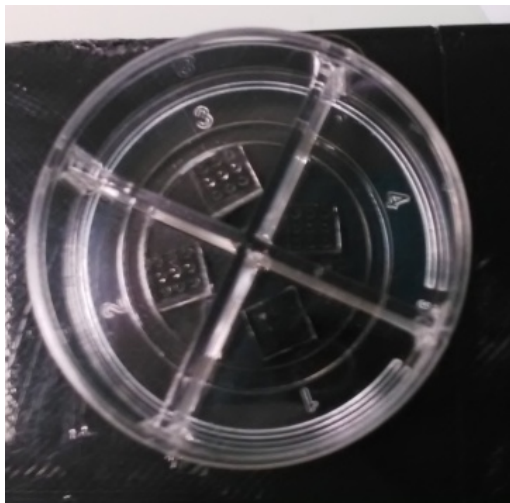4 arrays of 9 microdevices glued  
in a 35mm culture plate

VIDEOMICROSCOPY

### Supplementary Figure S5. Microdevice to study clustering at the single-cell scale

**a** Mask used for the fabrication of the silicon wafer. **b** One array of 9 PDMS micro-wells (outer diameter: 650 $\mu$ m, inner diameter: 450 $\mu$ m, and height: 200 $\mu$ m) that are **(c)** glued on the bottom of the compartments of CELLview™ cell culture dishes for monitoring by time-lapse video-microscopy.
