# Supplementary material for: Mitotic arrest affects clustering of tumor cells
Source: PubMed Central journal article supplement (PMC7847029; doi:10.1186/s13008-021-00070-z), 2021-01-29
Supplement: 13008_2021_70_MOESM10_ESM.pdf [file 13008_2021_70_MOESM10_ESM.pdf]

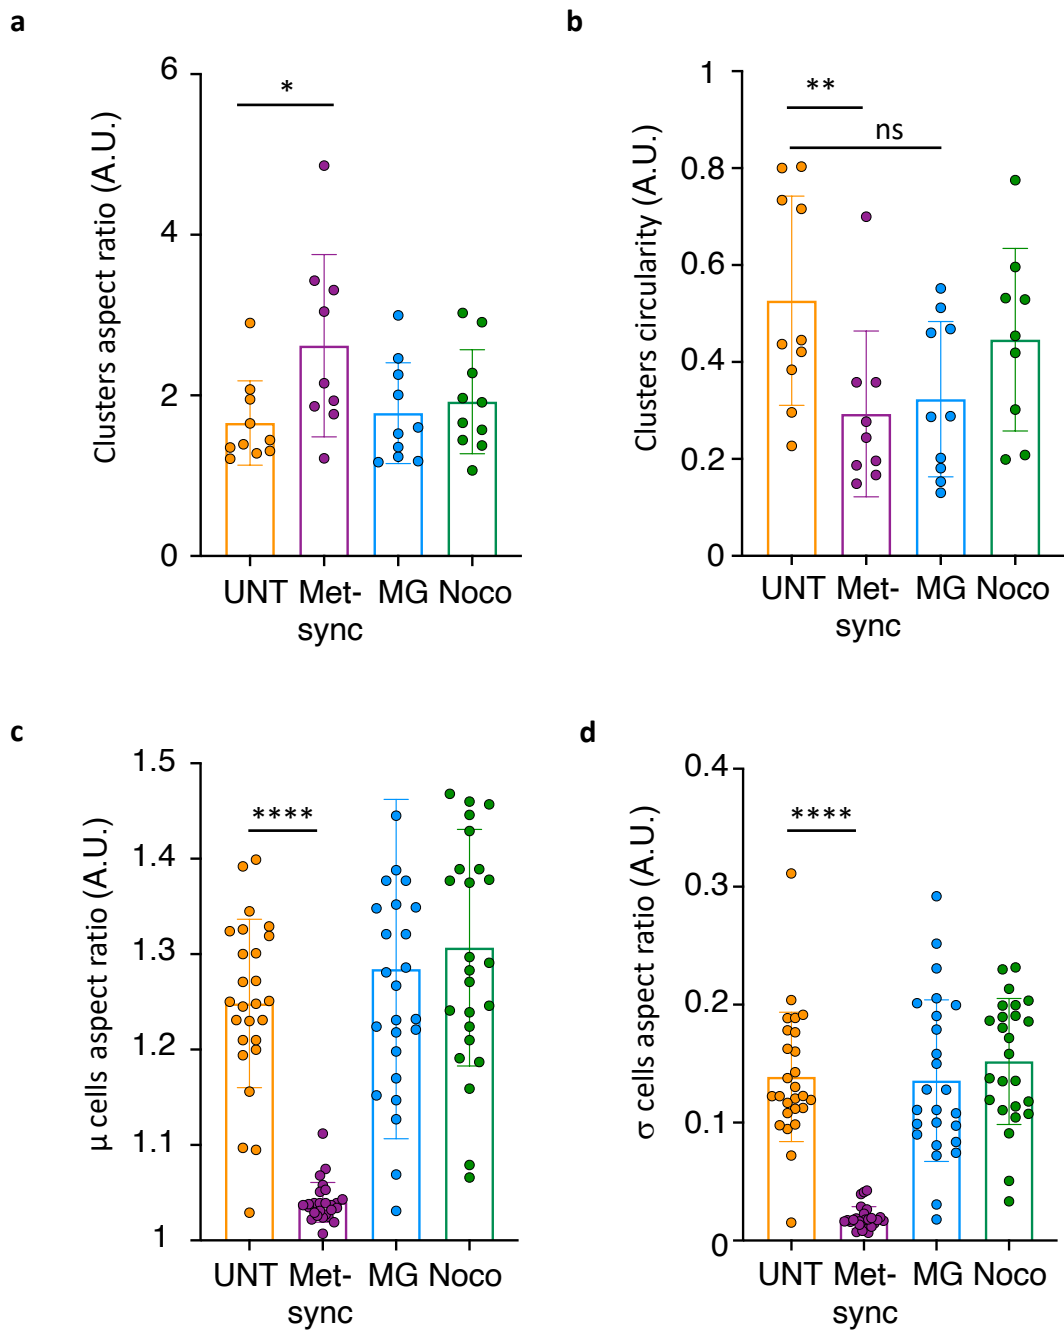

**Supplementary Figure S6. Characterization of clusters in control and experimental conditions.**

**a, b** Graphs showing the aspect ratio (**a**) and circularity (**b**) analysis results for the larger clusters formed in micro-wells in MCF-7 cells incubated or not (untreated, UNT) with nocodazole and MG132 (i.e., metaphase-synchronized/blocked, Met-sync), or with MG132 (MG) or nocodazole (Noco) alone after 3 hours of clustering. Each dot corresponds to the values in one micro-well from 5 independent experiments and bars correspond to the mean  $\pm$  SD. **c, d** Determination of the average ( $\mu$ ) (**c**) and standard deviation ( $\sigma$ ) (**d**) aspect ratio in single MCF-7 cells incubated or not (untreated, UNT) with nocodazole and MG132 (i.e., metaphase-synchronized/blocked, Met-sync), or with MG132 (MG) or nocodazole (Noco) alone after 1 hour of aggregation. Each dot corresponds to one cell and the bars correspond to the mean  $\pm$  SD. Data are from 5 independent experiments with 5-6 cells analyzed per experiment. \*,  $P < 0.05$ ; \*\*,  $P < 0.01$ ; \*\*\*\*,  $P < 0.0001$  (Mann Whitney non-parametric test).
